# Supplementary material
Source: PubMed Central journal article supplement (PMC5910253)
Supplement: NIHMS943357-supplement-3.pdf [file NIHMS943357-supplement-3.pdf]

## Flow Cytometry Reporting Summary

Form fields will expand as needed. Please do not leave fields blank.

### ▶ Data presentation

For all flow cytometry data, confirm that:

- 1. The axis labels state the marker and fluorochrome used (e.g. CD4-FITC).
- 2. The axis scales are clearly visible. Include numbers along axes only for bottom left plot of group (a 'group' is an analysis of identical markers).
- 3. All plots are contour plots with outliers or pseudocolor plots.
- 4. A numerical value for number of cells or percentage (with statistics) is provided.

### ▶ Methodological details

- |                                                                                        |                                                               |
|----------------------------------------------------------------------------------------|---------------------------------------------------------------|
| 5. Describe the sample preparation.                                                    | <input type="text" value="Provided in SI on page S4 and S5"/> |
| 6. Identify the instrument used for data collection.                                   | <input type="text" value="Provided in SI on page S4 and S5"/> |
| 7. Describe the software used to collect and analyze the flow cytometry data.          | <input type="text" value="FlowJo_V10"/>                       |
| 8. Describe the abundance of the relevant cell populations within post-sort fractions. | <input type="text" value="Provided in SI on page S4"/>        |
| 9. Describe the gating strategy used.                                                  | <input type="text" value="Provided in SI on page S4 and S5"/> |

Tick this box to confirm that a figure exemplifying the gating strategy is provided in the Supplementary Information.
